# Supplementary material for: The Low Energy Availability in Females Questionnaire (LEAF-Q) as a Useful Tool to Identify Female Triathletes at Risk for Menstrual Disorders Related to Low Energy Availability
Source: Nutrients. 2023 Jan 27;15(3):650. doi: 10.3390/nu15030650 (PMC9920150; doi:10.3390/nu15030650)
Supplement: Supplementary file 1 [file nutrients-15-00650-s001.zip › nutrients-2168140 - The LEAF-Q Scoring key.pdf]

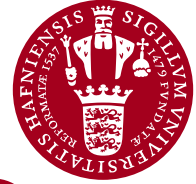

(Supplemental Digital Content 2)

## The LEAF-Q Scoring key

A total score  $\geq 8$  is to be considered at risk for the Triad

Department of Nutrition, Exercise and Sports  
Life Science  
University of Copenhagen  
Denmark

Contact: Anna Melin, [aot@life.ku.dk](mailto:aot@life.ku.dk)

1. A: **0** No, not at all, **1** Yes, once or twice, **2** Yes, three or four times, **3** Yes, five times or more
1. A1: **1** 1-7 days, **2** 8-14 days, **3** 15-21 days, **4** 22 days or more
2. A: **3** Yes, several times a day, **2** Yes, several times a week, **1** Yes, once or twice a week or more seldom, **0** Rarely or never
2. B: **3** Yes, several times a day, **2** Yes, several times a week, **1** Yes, once or twice a week or more seldom, **0** Rarely or never
2. C: **1** Several times a day, **0** Once a day, **2** Every second day, **3** Twice a week, **4** Once a week or more rarely
2. D: **0** Normal, **1** Diarrhoea-like, **2** Hard and dry
- 3.1 A1: **0** Contraception, **0** Reduction of menstruation pains, **0** Reduction of bleeding, **0** To regulate the menstrual cycle in relation to performances etc., **1** Otherwise menstruation stops
- 3.2 A: **0** 11 years or younger, **0** 12-14 years, **1** 15 years or older, **0** I don't remember, **8** I have never menstruated
- 3.2 B: **0** Yes, **1** No, **1** I don't remember
- 3.2 B1: **1** Hormonal treatment, **1** Weight gain, **1** Reduced amount of exercise, **1** Other
- 3.2 C: **0** Yes, **2** No (go to question 3.2 C6), **1** I don't know (go to question 3.2 C6)
- 3.2 C1: **0** 0-4 weeks ago, **1** 1-2 months ago, **2** 3-4 months ago, **3** 5 months ago or more
- 3.2 C2: **0** Yes, most of the time, **1** No, mostly not
- 3.2 C3: **1** 1-2 days, **0** 3-4 days, **0** 5-6 days, **0** 7-8 days, **0** 9 days or more
- 3.2 C4: **0** Yes, **0** No
- 3.2 C5: **0** 12 or more, **1** 9-11, **2** 6-8, **3** 3-5, **4** 0-2
- 3.2 C6: **1** 2-3 months ago, **2** 4-5 months ago, **3** 6 months ago or more
- 0** I'm pregnant and therefore do not menstruate
- 3.2 D: **0** No, never, **1** Yes, it has happened before, **2** Yes, that's the situation now
- 3.2 E: **1** Yes, **0** No
- 3.2 E1: **1** I bleed less, **1** I bleed fewer days, **2** My menstruations stops, **0** I bleed more, **0** I bleed more days
